# Supplementary material for: Enhancing osteogenic differentiation of MC3T3-E1 cells during inflammation using UPPE/β-TCP/TTC composites via the Wnt/β-catenin pathway
Source: Royal Society of Chemistry journal article supplement (doi:10.1039/d3ra05529a), 2024-01-01

**Electronic Supplementary Information of RA-ART-08-2023-005529**

**Enhancing osteogenic differentiation of MC3T3-E1 cells during inflammation  
using UPPE/ $\beta$ -TCP/TTC composites via Wnt/ $\beta$ -catenin pathway**

Qi-lin Li,<sup>abc</sup> Ya-xin Wu,<sup>abc</sup> Yu-xiao Zhang,<sup>abc</sup> Jing Mao,<sup>\*abc</sup> and Zhi-xing Zhang<sup>\*abc</sup>

\*Corresponding authors

<sup>a</sup> Department of Stomatology, Tongji Hospital, Tongji Medical College, Huazhong University of Science and Technology, Wuhan 430030, China.

<sup>b</sup> School of Stomatology, Tongji Medical College, Huazhong University of Science and Technology, Wuhan 430030, China.

<sup>c</sup> Hubei Province Key Laboratory of Oral and Maxillofacial Development and Regeneration, Wuhan 430022, China.

E-mail: [maojing@hust.edu.cn](mailto:maojing@hust.edu.cn) (Jing Mao) or [z zx@tjh.tjmu.edu.cn](mailto:z zx@tjh.tjmu.edu.cn) (Zhi-xing Zhang)

**Supplementary Figure 1.** The drug release curves of 1% TTC in UPPE/ $\beta$ -TCP+1%TCC samples.

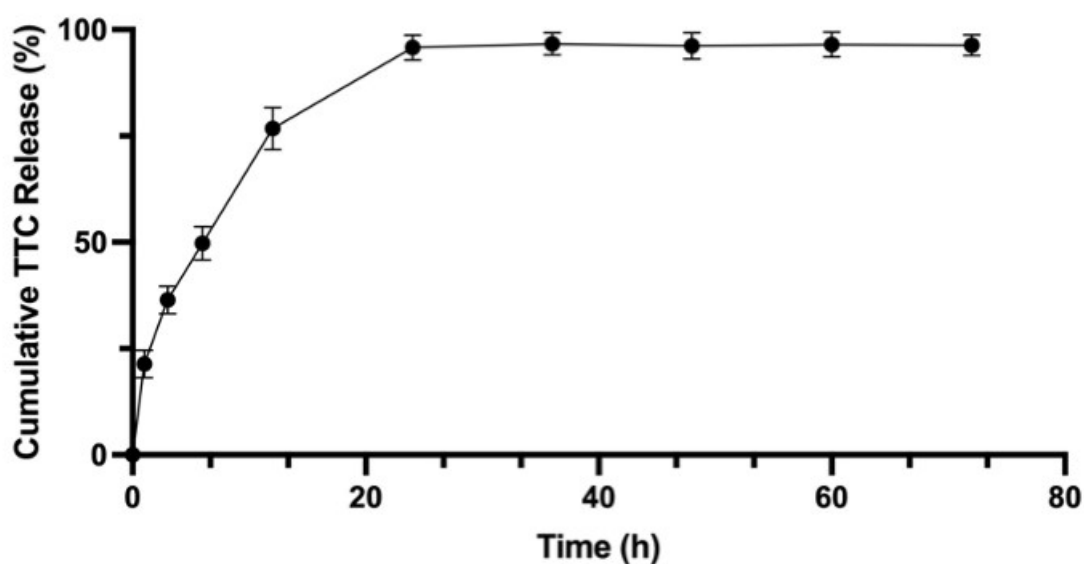

**Supplementary Figure 2.** (a) The antibacterial activity of the materials (UPPE/ $\beta$ -TCP and UPPE/ $\beta$ -TCP+1%TTC) was detected by the antibacterial ring assay and quantitative analysis in (b). \*\*\*P < 0.001, compared with the UPPE/ $\beta$ -TCP group.

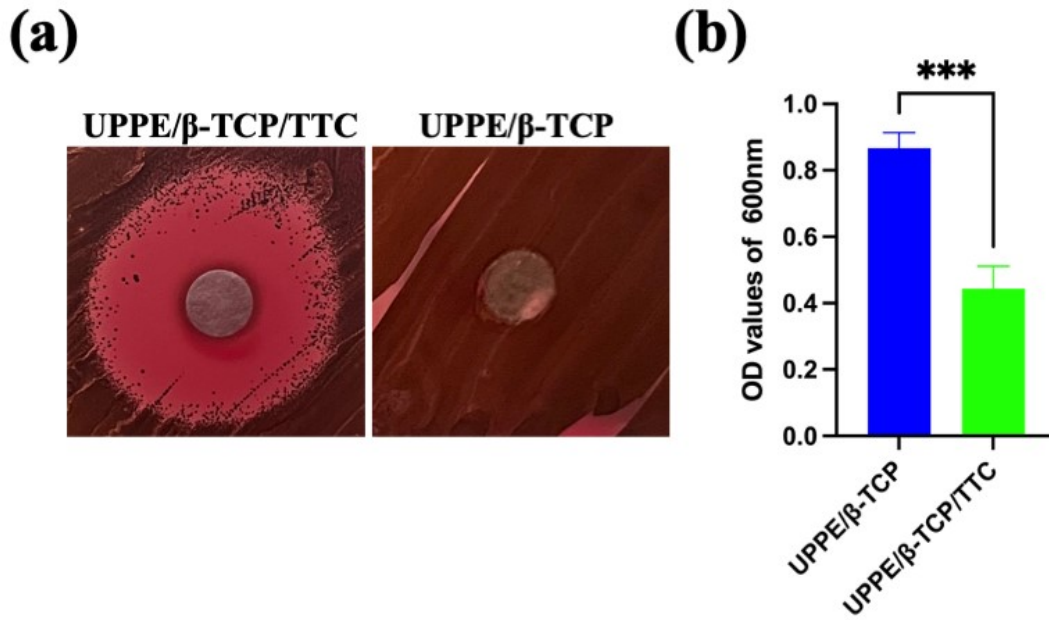

**Supplementary Figure 3.** The original band of gel electrophoresis used in Figure 4B.

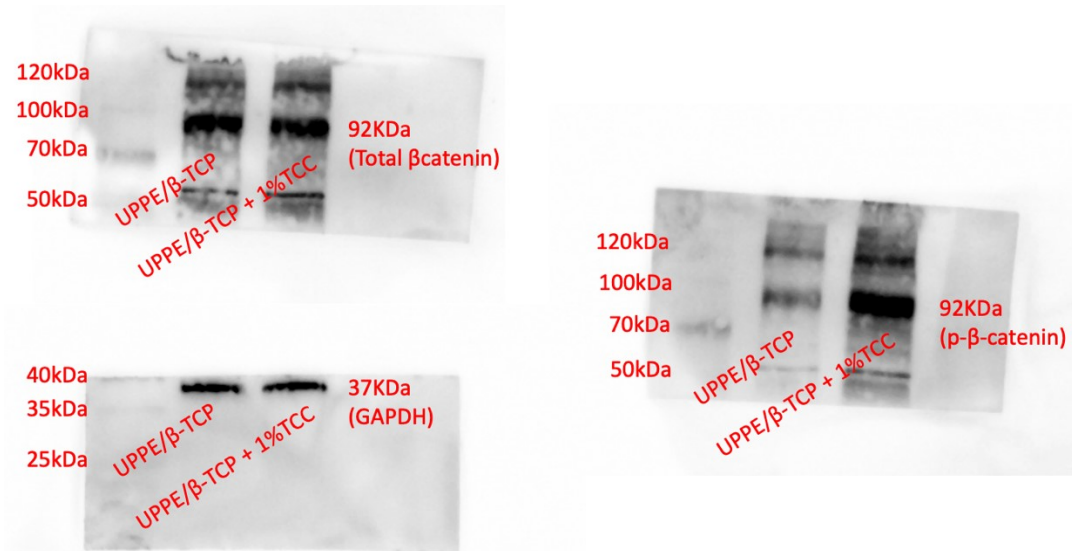

**Supplementary Figure 4.** The original band of gel electrophoresis used in Figure 4B.

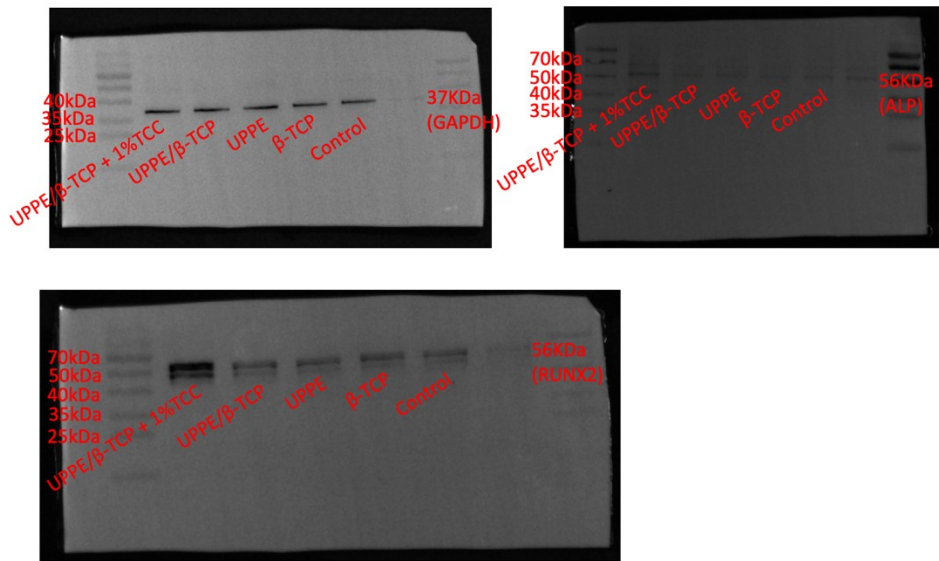

Supplement: d3ra05529a1.pdf [file d3ra05529a1.pdf]
